# Supplementary material for: Drivers of informal sector and non-prescription medication use in pediatric populations in a low- and middle-income setting: A prospective cohort study in Zambia
Source: PubMed Central journal article supplement (PMC10325117; doi:10.1371/journal.pgph.0002072), 2023-07-06
Supplement: pgph.0002072.s001.pdf [file pgph.0002072.s001.pdf]

*S1 Table. Prescription of medication in locations in the formal and informal health sector.*

|                | Hospital<br>(N=2003) | Community<br>clinic (N=2657) | Pharmacy<br>(N=284) | Street vendor<br>(N=23) | Friend/relative/<br>neighbor (N=16) | Chemical shop<br>(N=133) | Overall<br>(N=5116) |
|----------------|----------------------|------------------------------|---------------------|-------------------------|-------------------------------------|--------------------------|---------------------|
| Prescribed     | 1925 (96.1%)         | 2576 (97.0%)                 | 47 (16.5%)          | 0 (0%)                  | 3 (18.8%)                           | 47 (35.3%)               | 4598 (89.9%)        |
| Non-prescribed | 78 (3.9%)            | 81 (3.0%)                    | 237 (83.5%)         | 23 (100%)               | 13 (81.3%)                          | 86 (64.7%)               | 518 (10.1%)         |
