# Supplementary material for: Drivers of informal sector and non-prescription medication use in pediatric populations in a low- and middle-income setting: A prospective cohort study in Zambia
Source: PubMed Central journal article supplement (PMC10325117; doi:10.1371/journal.pgph.0002072), 2023-07-06
Supplement: pgph.0002072.s002.pdf [file pgph.0002072.s002.pdf]

*S2 Table. Location where medication was acquired in the informal health sector.*

| Location                       | Total N=457 (100%) |
|--------------------------------|--------------------|
| Pharmacy                       | 285 (62.4%)        |
| Street vendor                  | 23 (5.0%)          |
| Friend/relative/neighbor       | 16 (3.5%)          |
| Over the counter/Chemical shop | 133 (29.1%)        |
