# Supplementary material for: Drivers of informal sector and non-prescription medication use in pediatric populations in a low- and middle-income setting: A prospective cohort study in Zambia
Source: PubMed Central journal article supplement (PMC10325117; doi:10.1371/journal.pgph.0002072), 2023-07-06
Supplement: pgph.0002072.s003.pdf [file pgph.0002072.s003.pdf]

*S3 Table. Medication use for gastrointestinal disease and antibiotic use within the formal and informal sector compared between the trial and control group.*

| Variable                                                  |     | Trial group<br>n (column%) | Control group<br>n (column%) | P-value for chi-<br>square test |
|-----------------------------------------------------------|-----|----------------------------|------------------------------|---------------------------------|
| <b>Illness episodes with<br/>gastrointestinal disease</b> |     | <b>327 (100%)</b>          | <b>64 (100%)</b>             |                                 |
| Formal sector                                             |     | 289 (88.4%)                | 44 (68.8%)                   | <0.001                          |
| Informal sector                                           |     | 38 (11.6%)                 | 20 (31.3%)                   |                                 |
| <b>Illness episodes<br/>with formal sector drug use</b>   |     | 1229 (100%)                | 312 (100%)                   |                                 |
| Antibiotic usage                                          | Yes | 617 (50.2%)                | 249 (79.8%)                  | <0.001                          |
|                                                           | No  | 612 (49.8%)                | 63 (20.2%)                   |                                 |
| <b>Illness episodes with<br/>informal sector drug use</b> |     | 215 (100%)                 | 171 (100%)                   |                                 |
| Antibiotic usage                                          | Yes | 58 (27.0%)                 | 116 (67.8%)                  | 0.317                           |
|                                                           | No  | 157 (73.0%)                | 55 (32.2%)                   |                                 |
