# Supplementary material for: Drivers of informal sector and non-prescription medication use in pediatric populations in a low- and middle-income setting: A prospective cohort study in Zambia
Source: PubMed Central journal article supplement (PMC10325117; doi:10.1371/journal.pgph.0002072), 2023-07-06
Supplement: pgph.0002072.s004.pdf [file pgph.0002072.s004.pdf]

*S4 Table. Illness episode-level participant and illness characteristics stratified by use of medication from the formal and informal sector with pharmacy being considered formal sector.*

| Variable                               | Category                               | Total         | Formal sector<br>n (row %) | Informal sector<br>n (row %) | P-value for chi-<br>square test |
|----------------------------------------|----------------------------------------|---------------|----------------------------|------------------------------|---------------------------------|
| <b>Illness episodes</b>                |                                        | <b>N=1927</b> | <b>1773 (92.2%)</b>        | <b>149 (7.8%)</b>            |                                 |
| Sex                                    | Male                                   | N=1000        | 905 (90.5%)                | 95 (9.5%)                    | 0.003                           |
|                                        | Female                                 | N=927         | 873 (94.2%)                | 54 (5.8%)                    |                                 |
| Study site*                            | Matero                                 | N=429         | 407 (94.9%)                | 22 (5.1%)                    | <0.001                          |
|                                        | George                                 | N=1015        | 970 (95.6%)                | 45 (4.4%)                    |                                 |
|                                        | Chainda                                | N=483         | 401 (83.0%)                | 82 (17.0%)                   |                                 |
| SES                                    | Low                                    | N=643         | 602 (93.6%)                | 41 (6.4%)                    | 0.265                           |
|                                        | Medium                                 | N=644         | 592 (91.9%)                | 52 (8.1%)                    |                                 |
|                                        | High                                   | N=640         | 584 (91.2%)                | 56 (8.8%)                    |                                 |
| Distance to closest<br>study site (km) | <1                                     | N=799         | 747 (93.5%)                | 52 (6.5%)                    | 0.002                           |
|                                        | ≥1 and <3                              | N=759         | 681 (89.7%)                | 78 (10.3%)                   |                                 |
|                                        | ≥3                                     | N=369         | 350 (94.9%)                | 19 (5.1%)                    |                                 |
| Type of illness*                       | Respiratory                            | N=1123        | 1031 (91.8%)               | 92 (8.2%)                    | <0.001                          |
|                                        | General malaise,<br>fever, or headache | N=185         | 161 (87.0%)                | 24 (13.0%)                   |                                 |
|                                        | Wound/skin                             | N=150         | 147 (98.0%)                | 3 (2.0%)                     |                                 |
|                                        | Gastrointestinal                       | N=391         | 365 (93.4%)                | 26 (6.6%)                    |                                 |
|                                        | Other                                  | N=78          | 72 (92.3%)                 | 6 (7.7%)                     |                                 |

\*Statistically significant association with sector
