# Supplementary material for: Drivers of informal sector and non-prescription medication use in pediatric populations in a low- and middle-income setting: A prospective cohort study in Zambia
Source: PubMed Central journal article supplement (PMC10325117; doi:10.1371/journal.pgph.0002072), 2023-07-06
Supplement: pgph.0002072.s005.pdf [file pgph.0002072.s005.pdf]

S5 Table. Illness and medication use episode characteristics stratified by use of medication from the formal and informal sector with pharmacy being considered formal sector.

| Variable                       | Category   | Formal sector<br>n (column %) | Informal sector<br>n (column %) | P-value for chi-<br>square test |
|--------------------------------|------------|-------------------------------|---------------------------------|---------------------------------|
| <b>Medication use episodes</b> |            | <b>4948 (100%)</b>            | <b>172 (100%)</b>               |                                 |
| Route of administration        | Oral       | 4229 (85.5%)                  | 168 (97.6%)                     | <0.001                          |
|                                | Parenteral | 43 (0.9%)                     | 0 (0%)                          |                                 |
|                                | Topical    | 133 (2.7%)                    | 0 (0%)                          |                                 |
|                                | Nasal/otic | 395 (8.0%)                    | 1 (0.6%)                        |                                 |
|                                | Ophthalmic | 45 (0.9%)                     | 0 (0%)                          |                                 |
|                                | Inhaled    | 5 (0.1%)                      | 0 (0%)                          |                                 |
|                                | Missing    | 98 (2.0%)                     | 3 (1.7%)                        |                                 |
| Prescription                   | Yes        | 4552 (92.0%)                  | 50 (29.1%)                      | <0.001                          |
|                                | No         | 396 (8.0%)                    | 122 (70.9%)                     |                                 |
| <b>Illness episodes</b>        |            | <b>1773 (100%)</b>            | <b>149 (100%)</b>               |                                 |
| Number of medications          | 1          | 831 (46.9%)                   | 124 (83.2%)                     | <0.001                          |
|                                | >1         | 939 (53.0%)                   | 25 (16.8%)                      |                                 |
|                                | missing    | 3 (0.2%)                      | 0 (0.0%)                        |                                 |
| Antibiotic usage               | No         | 856 (48.3%)                   | 98 (65.8%)                      | <0.001                          |
|                                | Yes        | 917 (51.7%)                   | 51 (34.2%)                      |                                 |
