# Supplementary material for: Drivers of informal sector and non-prescription medication use in pediatric populations in a low- and middle-income setting: A prospective cohort study in Zambia
Source: PubMed Central journal article supplement (PMC10325117; doi:10.1371/journal.pgph.0002072), 2023-07-06
Supplement: pgph.0002072.s006.pdf [file pgph.0002072.s006.pdf]

S6 Table. Results of the logistic regression analysis with participant as a random intercept with pharmacy being considered formal sector.

| Child and illness episode characteristics            | Adjusted odds ratio | 95% CI            |
|------------------------------------------------------|---------------------|-------------------|
| Sex                                                  |                     |                   |
| Male                                                 | 1                   | -                 |
| Female                                               | 0.61                | 0.35-1.06         |
| Study site                                           |                     |                   |
| Matero (trial)                                       | 1                   | -                 |
| George (trial)                                       | 1.03                | 0.45-2.34         |
| Chainda (control)                                    | <b>5.04***</b>      | <b>2.17-11.69</b> |
| Socioeconomic status                                 |                     |                   |
| Low                                                  | 1                   | -                 |
| Medium                                               | 0.92                | 0.45-1.88         |
| High                                                 | 1.29                | 0.66-2.52         |
| Distance to closest study site (km)                  | 1.05                | 0.94-1.18         |
| Type of illness                                      |                     |                   |
| Respiratory                                          | 1                   | -                 |
| General malaise, fever, headache                     | <b>2.44***</b>      | <b>1.32-4.50</b>  |
| Wound/skin                                           | <b>0.10***</b>      | <b>0.01-0.73</b>  |
| Gastrointestinal                                     | 0.99                | 0.58-1.70         |
| Other                                                |                     |                   |
| Mixed effects model parameters                       |                     |                   |
| Marginal R <sup>2</sup> / Conditional R <sup>2</sup> | 0.167 / 0.488       |                   |

\*p ≤ 0.05

\*\*\*p ≤ 0.001
